# Supplementary material for: Determining the Clinical Utility of 16S rRNA Sequencing in the Management of Culture-Negative Pediatric Infections
Source: MDPI journal article supplement (doi:10.3390/antibiotics11020159), 2022-01-26
Supplement: s1 [file s1]

**Supplemental Table S1.** Summary of specimen types, conventional culture and 16S rRNA sequencing results, empiric antibiotic regimen and post-16S rRNA sequencing result antibiotic changes and overall clinical impact of the 16S rRNA sequencing result to the clinical decision making process of the 16S rRNA clinical samples that demonstrated no clinical utility. (Abbreviations: TMP-SMX=Trimethoprim-Sulfamethoxazole)

| Patient | Specimen Type                 | Antimicrobial Regimen Before 16S rRNA Sequencing Result | Conventional Culture Result                                             | 16S rRNA Sequencing Result                | Antimicrobial Regimen After 16S rRNA Sequencing Result | Clinical Diagnosis                                                | Clinical Impact of 16S rRNA Sequencing Result |
|---------|-------------------------------|---------------------------------------------------------|-------------------------------------------------------------------------|-------------------------------------------|--------------------------------------------------------|-------------------------------------------------------------------|-----------------------------------------------|
| 31      | Aortic clot                   | Vancomycin/Gentamicin/Ceftriaxone                       | No growth                                                               | Multiple bacterial DNA templates detected | Ceftriaxone                                            | Mycotic aneurysm                                                  | No clinical utility                           |
| 32      | Bronchoalveolar lavage        | Cefepime/Vancomycin                                     | No growth                                                               | No bacterial DNA detected                 | Vancomycin/Meropenem                                   | Multifocal pneumonia                                              | No clinical utility                           |
| 33      | Bone                          | Cefazolin                                               | No growth                                                               | No bacterial DNA detected                 | Cephalexin                                             | Left hip chronic osteomyelitis                                    | No clinical utility                           |
| 34      | Bone - Femur biopsy/tissue    | Cefazolin/Clindamycin                                   | No growth                                                               | No bacterial DNA detected                 | Cephalexin                                             | Left femur osteomyelitis                                          | No clinical utility                           |
| 35      | Bone - Iliac bone             | Ceftriaxone/Clindamycin                                 | No growth                                                               | No bacterial DNA detected                 | Ceftriaxone/Linezolid                                  | Left hip osteomyelitis                                            | No clinical utility                           |
| 36      | Bone - Left femur             | Cefazolin                                               | No growth                                                               | No bacterial DNA detected                 | Cephalexin                                             | Right tibia osteomyelitis and subperiosteal abscess               | No clinical utility                           |
| 37      | Bone - Periosteum             | Cefazolin                                               | No growth                                                               | No bacterial DNA detected                 | Cephalexin                                             | Left tibial osteomyelitis/Brodie's abscess                        | No clinical utility                           |
| 38      | Bone biopsy - Right first toe | Clindamycin                                             | No growth                                                               | No bacterial DNA detected                 | Clindamycin                                            | Right great toe chronic osteomyelitis                             | No clinical utility                           |
| 39      | Bone - calcaneus              | Cefepime/Clindamycin                                    | No growth                                                               | No bacterial DNA detected                 | Cefepime/Clindamycin                                   | Right calcaneal chronic osteomyelitis                             | No clinical utility                           |
| 40      | Bone infarct - Left femur     | Ceftriaxone                                             | No growth                                                               | No bacterial DNA detected                 | Amoxicillin-clavulanic acid                            | Left distal femur osteomyelitis                                   | No clinical utility                           |
| 41      | Cerebrospinal fluid           | Vancomycin/Ceftriaxone                                  | No growth                                                               | No bacterial DNA detected                 | Linezolid/Ceftriaxone                                  | Lumbar site wound infection/presumed meningitis                   | No clinical utility                           |
| 42      | Cerebrospinal fluid           | Vancomycin/Cefepime/Gentamicin/Acyclovir                | No growth                                                               | No bacterial DNA detected                 | None                                                   | Viral rhombencephalitis                                           | No clinical utility                           |
| 43      | Cerebrospinal fluid           | Cefepime/Vancomycin                                     | No growth                                                               | No bacterial DNA detected                 | Cefepime/Vancomycin                                    | Presumed Ventriculo-peritoneal shunt infection                    | No clinical utility                           |
| 44      | Cerebrospinal fluid           | Cefepime/Vancomycin                                     | No growth                                                               | No bacterial DNA detected                 | Cefepime/Linezolid                                     | Presumed meningitis                                               | No clinical utility                           |
| 45      | Cerebrospinal fluid           | Piperacillin-tazobactam/Gentamicin                      | No growth but nontypable <i>Haemophilus influenzae</i> in blood culture | No bacterial DNA detected                 | Meropenem/Gentamicin                                   | Non-typeable <i>Haemophilus influenzae</i> bacteremia/ meningitis | No clinical utility                           |

|    |                                    |                                   |                                                  |                           |                                     |                                                                   |                     |
|----|------------------------------------|-----------------------------------|--------------------------------------------------|---------------------------|-------------------------------------|-------------------------------------------------------------------|---------------------|
| 46 | Heart valve (melody and conduit)   | Vancomycin/Rifampin/Doxycycline   | No growth but Bartonella titers >1:1024 in serum | No bacterial DNA detected | Doxycycline                         | Infective endocarditis                                            | No clinical utility |
| 47 | Joint fluid                        | Vancomycin/Ceftriaxone            | No growth                                        | No bacterial DNA detected | Ceftriaxone                         | Septic arthritis                                                  | No clinical utility |
| 48 | Joint fluid - Elbow fluid          | Cefazolin/Clindamycin             | No growth                                        | No bacterial DNA detected | Cefadroxyl                          | Left humeral chronic osteomyelitis                                | No clinical utility |
| 49 | Joint fluid - Hip aspirate         | Vancomycin/Ceftriaxone            | No growth                                        | No bacterial DNA detected | Cephalexin                          | Right hip septic arthritis                                        | No clinical utility |
| 50 | Joint fluid - Hip fluid            | Vancomycin/Ceftriaxone            | No growth                                        | No bacterial DNA detected | Clindamycin                         | Left hip septic arthritis                                         | No clinical utility |
| 51 | Joint fluid - Left hip joint fluid | Cefepime                          | No growth                                        | No bacterial DNA detected | TMP-SMX                             | Left hip septic arthritis, osteomyelitis, urinary tract infection | No clinical utility |
| 52 | Joint fluid - Right hip fluid      | Vancomycin/Ceftriaxone            | No growth                                        | No bacterial DNA detected | Cephalexin                          | Right hip septic arthritis and osteomyelitis                      | No clinical utility |
| 53 | Joint fluid - Synovial fluid       | Vancomycin/Ceftriaxone            | No growth                                        | No bacterial DNA detected | Doxycycline                         | Left septic elbow                                                 | No clinical utility |
| 54 | Joint fluid - Synovial fluid       | Cefazolin                         | No growth                                        | No bacterial DNA detected | Cephalexin                          | Left knee septic arthritis                                        | No clinical utility |
| 55 | Joint fluid - Synovial fluid       | Cefazolin                         | No growth                                        | No bacterial DNA detected | Cephalexin                          | Left elbow chronic osteomyelitis                                  | No clinical utility |
| 56 | Joint fluid - Synovial fluid       | Vancomycin/Ceftriaxone            | No growth                                        | No bacterial DNA detected | Cefuroxime                          | Right knee septic arthritis                                       | No clinical utility |
| 57 | Joint fluid - Synovial fluid       | Cefazolin                         | No growth                                        | No bacterial DNA detected | Cefazolin                           | Left elbow septic arthritis and osteomyelitis                     | No clinical utility |
| 58 | Joint fluid - Synovial fluid       | Cefazolin                         | No growth                                        | No bacterial DNA detected | Cephalexin                          | Right hip septic arthritis                                        | No clinical utility |
| 59 | Lung tissue                        | Vancomycin/Meropenem/Posaconazole | No growth                                        | No bacterial DNA detected | Cefepime                            | Multifocal pneumonia                                              | No clinical utility |
| 60 | Pleural fluid                      | None                              | No growth                                        | No bacterial DNA detected | None                                | Fever of unknown origin                                           | No clinical utility |
| 61 | Pleural fluid                      | Vancomycin/Ceftriaxone            | No growth                                        | No bacterial DNA detected | Amoxicillin-clavulanic acid/TMP-SMX | Empyema                                                           | No clinical utility |
| 62 | Pleural fluid                      | Ceftriaxone/Azithromycin          | No growth                                        | No bacterial DNA detected | Amoxicillin-clavulanic acid         | Complicated pneumonia                                             | No clinical utility |
| 63 | Pleural fluid                      | Levofloxacin                      | No growth                                        | No bacterial DNA detected | None                                | Left Lower Lobe pneumonia with pleural effusion                   | No clinical utility |
| 64 | Pus - Abscess                      | Vancomycin/Meropenem              | No growth                                        | No bacterial DNA detected | Meropenem                           | Spinal osteo, hardware infection                                  | No clinical utility |
| 65 | Pus - Intraabdominal abscess       | Ciprofloxacin/Metronidazole       | No growth                                        | No bacterial DNA detected | Aztreonam/Metronidazole             | Recurrent intraabdominal abscess                                  | No clinical utility |
| 66 | Pus - Thigh abscess                | Cefazolin                         | <i>Pseudomonas aeruginosa</i> on culture         | No bacterial DNA detected | Ciprofloxacin                       | Right thigh abscess                                               | No clinical utility |

|    |                                                   |                             |                                                             |                           |                       |                                               |                     |
|----|---------------------------------------------------|-----------------------------|-------------------------------------------------------------|---------------------------|-----------------------|-----------------------------------------------|---------------------|
| 67 | Pus - Wound stump/draining sinus                  | Vancomycin/Cefepime         | No growth                                                   | No bacterial DNA detected | TMP-SMX               | Below the Knee Amputation Stump Osteomyelitis | No clinical utility |
| 68 | Soft tissue - Biopsy back                         | Vancomycin/Cefepime         | No growth                                                   | No bacterial DNA detected | Ceftriaxone/Linezolid | Spinal hardware infection                     | No clinical utility |
| 69 | Soft tissue - Left thigh tissue                   | TMP-SMX/Meropenem/Linezolid | No growth                                                   | No bacterial DNA detected | Meropenem/Linezolid   | Abscess thigh and arm                         | No clinical utility |
| 70 | Soft tissue - Tissue                              | Piperacillin-tazobactam     | <i>Escherichia vulneris</i> on culture                      | No bacterial DNA detected | Doxycycline           | R Chronic trapezoid osteomyelitis             | No clinical utility |
| 71 | Spine tissue (Lumbar 1-Lumbar 2 disk)             | Cefazolin                   | No growth                                                   | No bacterial DNA detected | Cephalexin            | L1/L2 discitis with osteomyelitis             | No clinical utility |
| 72 | Spine tissue - Perispinal abscess hardware/tissue | Vancomycin/Cefepime         | No growth                                                   | No bacterial DNA detected | Ceftriaxone/Linezolid | Chronic spinal osteomyelitis                  | No clinical utility |
| 73 | Spine tissue - Spinal rod                         | Vancomycin/Cefepime         | No growth but Group B <i>Streptococcus</i> in blood culture | No bacterial DNA detected | Ampicillin            | Paraspinal abscess                            | No clinical utility |
| 74 | Spine tissue - Spinal rod biopsy                  | Vancomycin/Cefepime         | No growth                                                   | No bacterial DNA detected | Cefepime/Linezolid    | Cerebrospinal Fluid leak/presumed meningitis  | No clinical utility |
